# Supplementary material for: Associations between Plasma Folate and Vitamin B12, Blood Lead, and Bone Mineral Density among Adults and Elderly Who Received a Health Examination
Source: MDPI journal article supplement (doi:10.3390/nu14040911), 2022-02-21
Supplement: s1 [file s1]

## Supplementary Tables

**Table S1.** The validity and reliability of the measurement of urinary arsenic species, red blood cell lead and cadmium, and plasma homocysteine, vitamin B<sub>12</sub>, and folate.

| Measurements                               | Instrument                                                                              | Detection limit | Recovery rate (%) | Standard reference materials (SRM)                                                                                                                                   | Coefficient of variance (%) |
|--------------------------------------------|-----------------------------------------------------------------------------------------|-----------------|-------------------|----------------------------------------------------------------------------------------------------------------------------------------------------------------------|-----------------------------|
| Arsenite (As <sup>III</sup> )              | High-performance liquid chromatography-hydride generator-atomic absorption spectrometry | 0.02 µg/L       | 93.8 - 102.2      | SRM 2670 (National Institute of Standards and Technology, Gaithersburg, MD) certificate value 480 ± 100 µg/L inorganic arsenic, in our system 507 ± 17 µg/L (n = 4). | < 10                        |
| Arsenate (As <sup>V</sup> )                |                                                                                         | 0.10 µg/L       |                   |                                                                                                                                                                      |                             |
| Monomethylarsonic acid (MMA <sup>V</sup> ) |                                                                                         | 0.07 µg/L       |                   |                                                                                                                                                                      |                             |
| Dimethylarsinic acid (DMA <sup>V</sup> )   |                                                                                         | 0.06 µg/L       |                   |                                                                                                                                                                      |                             |
| Blood lead                                 | Inductively coupled plasma mass spectrometry                                            | 0.32 µg/dL      | 100 ± 20          | SRMs (Seronorm Trace Elements Whole Blood L-2 (Lot 1103129)) certificate value 5.8 µg/L (range: 5.4–6.2 µg/L) in our system 6.1 ± 0.5 µg/L                           | < 10                        |
| Blood cadmium                              | Inductively coupled plasma mass spectrometry                                            | 0.07 µg/L       | 100 ± 20          | SRMs (Seronorm Trace Elements Whole Blood L-2 (Lot 1103129)) certificate value 310.0 µg/L (range 186.0–434.0 µg/L), in our system 329.0 ± 17.0 µg/L                  | < 10                        |
| Plasma Vitamin B <sub>12</sub>             | Radioassay kit (Bio-Rad, Richmond, CA) and the 1470 Wizard series gamma counter         | 75 pg/mL        |                   |                                                                                                                                                                      | 6.8                         |
| Plasma folate                              | Radioassay kit (Bio-Rad, Richmond, CA) and the 1470 Wizard series gamma counter         | 0.6 ng/mL       |                   |                                                                                                                                                                      | 9.3                         |
